# Supplementary material
Source: PubMed Central journal article supplement (PMC2048806)
Supplement: plntphys_pp.107.103325_2.pdf [file plntphys_pp.107.103325_2.pdf]

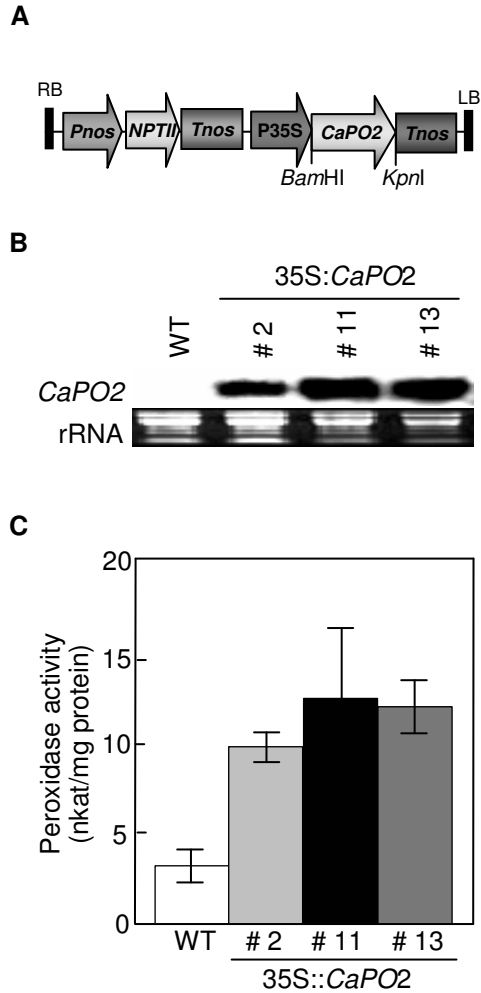

**Supplemental Figure S2.** Generation of Arabidopsis *CaPO2*-OX plants that express the *CaPO2* gene. A, Construct for expressing the pepper *CaPO2* gene in transgenic Arabidopsis. *Pnos*, 5'-upstream sequence of the nopaline synthase gene; *NPTII*, neomycin phosphotransferase II; *P35S*, 5'-upstream sequence of the CaMV 35S promoter; *Tnos*, polyadenylation signal sequence of the nopaline synthase gene in the Ti plasmid. B, Northern blot analysis of total RNA from 4-week-old wild-type (Col-0) and transgenic Arabidopsis ( $T_2$ ) leaves transformed with pBIN35S: *CaPO2*. Equal loading of total RNA (10  $\mu$ g per lane) was verified by visualizing rRNA on a gel stained with ethidium bromide. WT, Col-0. C, Spectrophotometric quantification of total peroxidase activity in Arabidopsis wild-type and *CaPO2*-OX plants. WT, wild-type; *35S::CaPO2*, *CaPO2*-OX lines. Data are the means  $\pm$  standard deviations from five independent experiments.
