# Supplementary material
Source: PubMed Central journal article supplement (PMC2048806)
Supplement: plntphys_pp.107.103325_3.pdf [file plntphys_pp.107.103325_3.pdf]

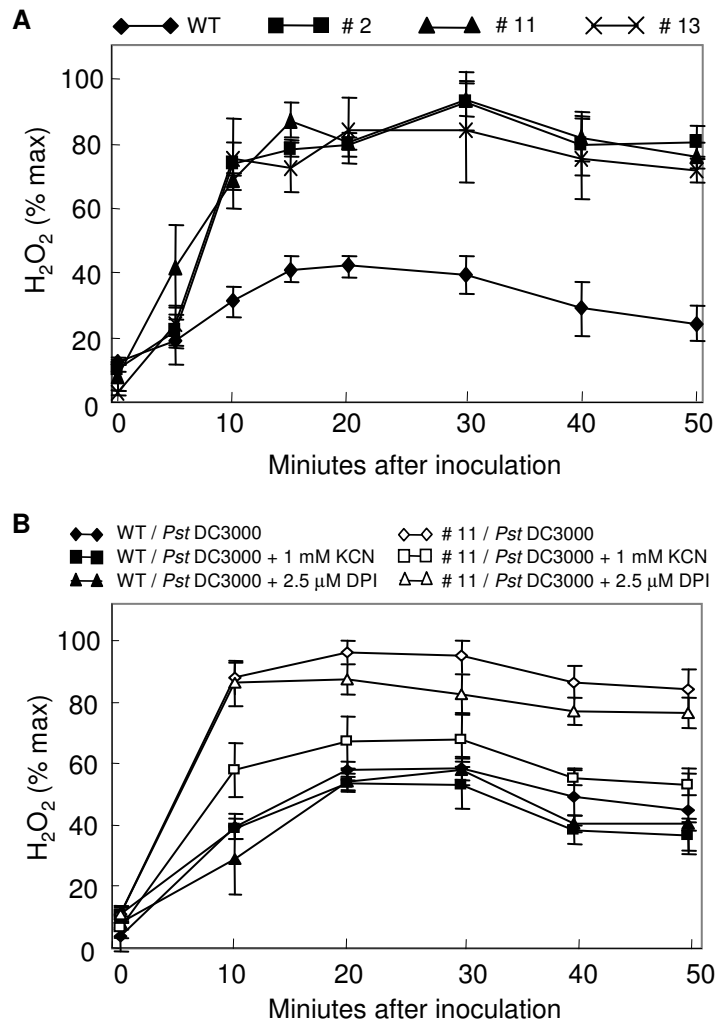

**Supplemental Figure S3.** Quantification of H<sub>2</sub>O<sub>2</sub> in leaves of wild-type (Col-0) and *CaPO2-OX* lines of *Arabidopsis*, using the xylenol orange assay. Data are the means  $\pm$  standard deviations from three independent experiments. A, Relative amounts of H<sub>2</sub>O<sub>2</sub> in leaf discs at different time points after inoculation with 10<sup>7</sup> cfu ml<sup>-1</sup> of *Pseudomonas syringae* pv. *tomato* (*Pst*) DC3000. B, Relative amounts of H<sub>2</sub>O<sub>2</sub> in leaf discs at different time points after inoculation with 10<sup>7</sup> cfu ml<sup>-1</sup> of *Pst* DC3000 in the presence or absence of 1 mM KCN or 2.5  $\mu$ M DPI. WT, wild-type.
